# Supplementary material for: Pore size distribution and capacitance in microporous carbons
Source: Royal Society of Chemistry journal article supplement (doi:10.1039/c2cp41545c), 2012-01-01
Supplement: c2cp41545c.pdf [file c2cp41545c.pdf]

## Supplementary Information

### Pore size distribution and capacitance in microporous carbons

Fritz Stoeckli<sup>\*</sup>, Teresa A. Centeno<sup>\*</sup>

E-mail: [fritz.stoeckli@unine.ch](mailto:fritz.stoeckli@unine.ch), [teresa@incar.csic.es](mailto:teresa@incar.csic.es)

**Table S1.** Structural and electrochemical properties of the carbons. The average pore size  $L_{av}$  corresponds to the range of 0.7 to 2.0 nm of the NLDFT pore size distributions, and  $S_{tot\ NLDFT}$  is the total area above 0.7 nm, accessible to the  $(C_2H_5)_4N^+$  ion (0.68 nm).

| Carbon    | $L_{av}$<br>nm | $S_{tot\ NLDFT}$<br>$m^2\ g^{-1}$ | $S_e\ NLDFT$<br>$m^2\ g^{-1}$ | $S_{mi\ NLDFT}$<br>$m^2\ g^{-1}$ | $C_{total}$<br>$F\ g^{-1}$ | $C_{mi}$<br>$F\ g^{-1}$ | $(C/S)_{tot}$<br>$F\ m^{-2}$ | $(C/S)_{mi}$<br>$F\ m^{-2}$ | $(C/S)_{mi}$<br>Eqn (1)<br>$F\ m^{-2}$ |
|-----------|----------------|-----------------------------------|-------------------------------|----------------------------------|----------------------------|-------------------------|------------------------------|-----------------------------|----------------------------------------|
| CMS       | 0.81           | 570                               | 8                             | 562                              | 55                         | 54.3                    | 0.096                        | 0.097                       | 0.132                                  |
| HK-650-8  | 0.84           | 522                               | 15                            | 507                              | 40                         | 38.6                    | 0.078                        | 0.076                       | 0.134                                  |
| PAU-1     | 0.85           | 975                               | 7                             | 968                              | 75                         | 74.3                    | 0.077                        | 0.077                       | 0.135                                  |
| SiC-800   | 0.85           | 1064                              | 17                            | 1047                             | 93                         | 91.4                    | 0.087                        | 0.087                       | 0.134                                  |
| TiC-600   | 0.86           | 1168                              | 6                             | 1162                             | 119                        | 118.4                   | 0.102                        | 0.102                       | 0.139                                  |
| RM-1      | 0.87           | 801                               | 0                             | 801                              | 87                         | 87.0                    | 0.109                        | 0.109                       | 0.136                                  |
| PAU-1-950 | 0.87           | 848                               | 26                            | 822                              | 93                         | 90.6                    | 0.110                        | 0.110                       | 0.135                                  |
| AC-507-17 | 0.88           | 1098                              | 1                             | 1098                             | 95                         | 95.0                    | 0.087                        | 0.087                       | 0.136                                  |
| CEP-2008  | 0.95           | 976                               | 65                            | 911                              | 90                         | 83.9                    | 0.092                        | 0.092                       | 0.133                                  |
| M2        | 0.97           | 981                               | 20                            | 961                              | 97                         | 95.0                    | 0.099                        | 0.099                       | 0.132                                  |
| TiC-TiO2  | 1.02           | 1416                              | 45                            | 1371                             | 128                        | 124.0                   | 0.090                        | 0.090                       | 0.132                                  |
| DCG-5     | 1.04           | 918                               | 57                            | 861                              | 83                         | 77.6                    | 0.090                        | 0.090                       | 0.131                                  |
| M1R-950   | 1.08           | 1137                              | 24                            | 1113                             | 90                         | 87.7                    | 0.079                        | 0.079                       | 0.133                                  |
| BCKA      | 1.08           | 1132                              | 30                            | 1102                             | 92                         | 89.2                    | 0.081                        | 0.081                       | 0.130                                  |
| KF-1500   | 1.12           | 1187                              | 75                            | 1112                             | 107                        | 99.9                    | 0.090                        | 0.090                       | 0.128                                  |
| F-02      | 1.12           | 942                               | 48                            | 894                              | 89                         | 84.5                    | 0.095                        | 0.094                       | 0.129                                  |
| M1-R      | 1.15           | 1037                              | 37                            | 1000                             | 91                         | 87.5                    | 0.088                        | 0.088                       | 0.127                                  |
| N-125     | 1.17           | 928                               | 74                            | 854                              | 83                         | 76.0                    | 0.089                        | 0.089                       | 0.127                                  |
| PC-94-11  | 1.2            | 779                               | 5                             | 774                              | 80                         | 79.5                    | 0.103                        | 0.103                       | 0.125                                  |
| U03       | 1.26           | 642                               | 80                            | 562                              | 66.5                       | 59.0                    | 0.104                        | 0.105                       | 0.124                                  |
| U02-ox    | 1.33           | 560                               | 84                            | 472                              | 58                         | 50.0                    | 0.104                        | 0.106                       | 0.118                                  |

Below, we show typical NLDFT-based PSDs of carbons of the present series, which are predominantly nanoporous. The gap in the PSDs, observed near 1 nm for many carbons (but not all), is a known characteristic of NLDFT, but less relatively small. With respect to the values of Table S1, the smoothing of the PSD over this gap leads to an increase in the area  $S_{mi\ NLDFT}$  typically between 3 and 10 percent (see Table S2, below). This does not modify significantly the overall picture reported in this paper, namely the absence of a clear trend in  $(C/S)_{mi}$ , nor the fact that the PSDs do not hide significant variations of C/S given by  $dC/ds$  and shown in Fig. 1.

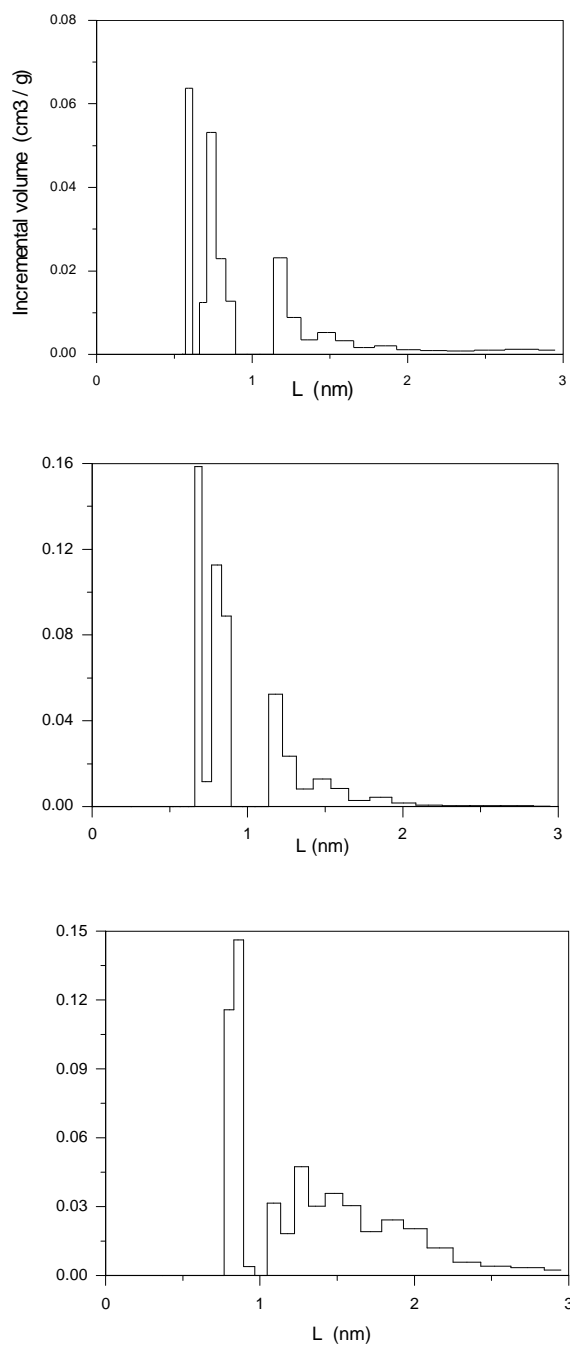

**Fig. S1.** Typical NLDFT-based pore size distributions for nitrogen adsorption at 77 K. Samples CMS (top), TiC-600 (middle) and M1-R (bottom). The latter displays some porosity between 2 and 3 nm, with an area of  $24 \text{ m}^2 \text{ g}^{-1}$ . Its contribution to C is assumed to be  $0.094 \text{ F m}^{-2}$ , as for the entire external surface area ( $37 \text{ m}^2 \text{ g}^{-1}$ ), but in any case the correction leading to  $C_{\text{mi}}$  is relatively small. Moreover, if one considers the porosity up to 3 nm,  $L_{\text{av}}$  increases only from 1.15 to 1.20 nm.

**Table S2.** Comparison of specific capacitances  $C/S$  in micropores between 0.7 and 1.3 nm, by using (a) the original NLDFT PSDs with a gap around 1 nm, leading to  $(C/S)_{mi}$ , and (b) by adding the estimated area of the gap  $S_{gap, NLDFT}$ , which leads to  $(C/S)_{mi+gap}$ . Neither series shows a definite trend with respect to  $L_{av}$  and the respective averages are  $0.093 \pm 0.010 \text{ F m}^{-2}$  and  $0.087 \pm 0.010 \text{ F m}^{-2}$ . No reliable correction could be applied in the case of the shredded PSDs of carbons (8) and (19). Carbons (2)(6)(11) and (12) show no gaps in their PSDs.

| Carbon      | $L_{av}$<br>nm | $S_{mi, NLDFT}$<br>$\text{m}^2 \text{g}^{-1}$ | $S_{gap, NLDFT}$<br>$\text{m}^2 \text{g}^{-1}$ | $S_{mi+gap}$<br>$\text{m}^2 \text{g}^{-1}$ | $C_{mi}$<br>$\text{F g}^{-1}$ | $(C/S)_{mi}$<br>$\text{F m}^{-2}$ | $(C/S)_{mi+gap}$<br>$\text{F m}^{-2}$ |
|-------------|----------------|-----------------------------------------------|------------------------------------------------|--------------------------------------------|-------------------------------|-----------------------------------|---------------------------------------|
| 1 CMS       | 0.81           | 562                                           | 35                                             | 597                                        | 54.3                          | 0.097                             | 0.091                                 |
| 2 HK-650-8  | 0.84           | 507                                           | 0                                              | 507                                        | 38.6                          | 0.076                             | 0.076                                 |
| 3 PAU-1     | 0.85           | 968                                           | 40                                             | 1008                                       | 74.3                          | 0.077                             | 0.074                                 |
| 4 SiC-800   | 0.85           | 1047                                          | 10                                             | 1057                                       | 91.4                          | 0.087                             | 0.086                                 |
| 5 TiC-600   | 0.86           | 1162                                          | 148                                            | 1310                                       | 118.4                         | 0.102                             | 0.090                                 |
| 6 RM-1      | 0.87           | 801                                           | 0                                              | 801                                        | 87.0                          | 0.109                             | 0.109                                 |
| 7 PAU-1-950 | 0.87           | 822                                           | 25                                             | 847                                        | 90.6                          | 0.110                             | 0.107                                 |
| 8 AC-507-17 | 0.88           | 1098                                          | -                                              | -                                          | 95.0                          | 0.087                             | -                                     |
| 9 CEP-2008  | 0.95           | 911                                           | 31                                             | 942                                        | 83.9                          | 0.092                             | 0.089                                 |
| 10 M2       | 0.97           | 961                                           | 27                                             | 988                                        | 95.0                          | 0.099                             | 0.096                                 |
| 11 TiC-TiO2 | 1.02           | 1371                                          | 0                                              | 1371                                       | 124.0                         | 0.090                             | 0.090                                 |
| 12 DCG-5    | 1.04           | 861                                           | 0                                              | 861                                        | 77.6                          | 0.090                             | 0.090                                 |
| 13 M1R-950  | 1.08           | 1113                                          | 87                                             | 1200                                       | 87.7                          | 0.079                             | 0.073                                 |
| 14 BCKA     | 1.08           | 1102                                          | 34                                             | 1136                                       | 89.2                          | 0.081                             | 0.079                                 |
| 15 KF-1500  | 1.12           | 1112                                          | 86                                             | 1198                                       | 99.9                          | 0.090                             | 0.083                                 |
| 16 F-02     | 1.12           | 894                                           | 35                                             | 929                                        | 84.5                          | 0.094                             | 0.091                                 |
| 17 M1-R     | 1.15           | 1000                                          | 33                                             | 1033                                       | 87.5                          | 0.088                             | 0.085                                 |
| 18 N-125    | 1.17           | 854                                           | 21                                             | 875                                        | 76.0                          | 0.089                             | 0.087                                 |
| 19 PC-94-11 | 1.2            | 774                                           | -                                              | -                                          | 79.5                          | 0.103                             | -                                     |
| 20 U03      | 1.26           | 562                                           | 196                                            | 758                                        | 59.0                          | 0.105                             | 0.078                                 |
| 21 U02-ox   | 1.33           | 472                                           | 112                                            | 584                                        | 50.0                          | 0.106                             | 0.086                                 |
